# Supplementary material for: Green steel: design and cost analysis of hydrogen-based direct iron reduction
Source: Royal Society of Chemistry journal article supplement (doi:10.1039/d3ee01077e), 2023-01-01
Supplement: d3ee01077e1.pdf [file d3ee01077e1.pdf]

## Supplementary Information

### **Green steel: design and cost analysis of hydrogen-based direct iron reduction**

Fabian Rosner<sup>a</sup>, Dionissios Papadias<sup>b</sup>, Kriston Brooks<sup>c</sup>, Kelvin Yoro<sup>a</sup>, Rajesh Ahluwalia<sup>b</sup>, Tom Autrey<sup>d</sup>, Hanna

---

<sup>a</sup> Energy Analysis and Environmental Impacts Division, Lawrence Berkeley National Laboratory, Berkeley, CA 94720, USA.

<sup>b</sup> Argonne National Laboratory.

<sup>c</sup> Energy and Environment Directorate, Pacific Northwest National Laboratory, Richland, WA 99352, USA.

<sup>d</sup> Physical and Computational Sciences Directorate, Pacific Northwest National Laboratory, Richland, WA 99352, USA

† Corresponding author (hannabreunig@lbl.gov).

Breunig<sup>a†</sup>

13 pp

12 Tables

5 Figures

## S1. State-point stream data

**Table S1:** State-point stream data for the NG-DRI-B case

| Stream Number                  | Unit       | 1       | 2       | 3       | 4     | 5      | 6       | 7       | 8       | 9       |
|--------------------------------|------------|---------|---------|---------|-------|--------|---------|---------|---------|---------|
| Temperature                    | °C         | 25      | 850     | 466     | 25    | 66     | 500     | 433     | 25      | 500     |
| Pressure                       | bar        | 2.0     | 2.7     | 1.7     | 4.0   | 1.6    | 1.1     | 0.9     | 4.0     | 2.9     |
| Mole Flowrate                  | kmol/h     | 1,436   | 11,143  | 11,204  | 323   | 3,356  | 8,633   | 11,089  | 1,399   | 8,477   |
| Mass Flowrate                  | kg/h       | 216,134 | 163,566 | 221,313 | 5,175 | 65,653 | 248,268 | 313,921 | 22,450  | 163,566 |
| Molar Vapor Fraction           | –          | 0       | 1       | 1       | 1     | 1      | 1       | 1       | 1       | 1       |
| Composition                    | mole-basis |         |         |         |       |        |         |         |         |         |
| O <sub>2</sub>                 | –          | 0       | 0       | 0       | 0     | 0      | 0.208   | 0.022   | 0       | 0       |
| N <sub>2</sub>                 | –          | 0       | 0       | 0       | 0     | 0      | 0.783   | 0.610   | 0       | 0       |
| H <sub>2</sub> O               | –          | 0       | 0.084   | 0.263   | 0     | 0.165  | 0.008   | 0.219   | 0       | 0.153   |
| H <sub>2</sub>                 | –          | 0       | 0.510   | 0.339   | 0     | 0.340  | 0       | 0       | 0       | 0.314   |
| CH <sub>4</sub>                | –          | 0       | 0.007   | 0.002   | 1     | 0.098  | 0       | 0       | 1.000   | 0.167   |
| CO                             | –          | 0       | 0.345   | 0.196   | 0     | 0.196  | 0       | 0       | 0       | 0.181   |
| CO <sub>2</sub>                | –          | 0       | 0.053   | 0.200   | 0     | 0.200  | 0       | 0.150   | 0       | 0.185   |
| Fe <sub>2</sub> O <sub>3</sub> | –          | 0.895   | 0       | 0       | 0     | 0      | 0       | 0       | 0       | 0       |
| Al <sub>2</sub> O <sub>3</sub> | –          | 0.030   | 0       | 0       | 0     | 0      | 0       | 0       | 0       | 0       |
| SiO <sub>2</sub>               | –          | 0.075   | 0       | 0       | 0     | 0      | 0       | 0       | 0       | 0       |
| Fe                             | –          | 0       | 0       | 0       | 0     | 0      | 0       | 0       | 0       | 0       |
| C                              | –          | 0       | 0       | 0       | 0     | 0      | 0       | 0       | 0       | 0       |
| Total                          | –          | 1.000   | 1.000   | 1.000   | 1.000 | 1.000  | 1.000   | 1.000   | 1.000   | 1.000   |
| Stream Number                  | Unit       | 10      | 11      | 12      | 13    | 14     | 15      | 16      | 17      |         |
| Temperature                    | °C         | 700     | 148     | 148     | 25    | 25     | 25      | 925     | 1650    |         |
| Pressure                       | bar        | 2.0     | 10.0    | 10.0    | 4.0   | 1.0    | 1.0     | 1.0     | 1.0     |         |
| Mole Flowrate                  | kmol/h     | 2,705   | 15      | 233     | 60    | 310    | –       | 1,545   | 2,485   |         |
| Mass Flowrate                  | kg/h       | 158,849 | 467     | 7,392   | 957   | 3,723  | 6,791   | 45,449  | 135,812 |         |
| Molar Vapor Fraction           | –          | 0       | 1       | 1       | 1     | 0      | 0       | 1       | 0       |         |
| Composition                    | mole-basis |         |         |         |       |        |         |         |         |         |
| O <sub>2</sub>                 | –          | 0       | 0.945   | 0.945   | 0     | 0      | 0       | 0.087   | 0       |         |
| N <sub>2</sub>                 | –          | 0       | 0.055   | 0.055   | 0     | 0      | 0       | 0.602   | 0       |         |
| H <sub>2</sub> O               | –          | 0       | 0       | 0       | 0     | 0      | 0       | 0.077   | 0       |         |
| H <sub>2</sub>                 | –          | 0       | 0       | 0       | 0     | 0      | 0       | 0       | 0       |         |
| CH <sub>4</sub>                | –          | 0       | 0       | 0       | 1.000 | 0      | 0       | 0       | 0       |         |
| CO                             | –          | 0       | 0       | 0       | 0     | 0      | 0       | 0.119   | 0       |         |
| CO <sub>2</sub>                | –          | 0       | 0       | 0       | 0     | 0      | 0       | 0.115   | 0       |         |
| Fe <sub>2</sub> O <sub>3</sub> | –          | 0.029   | 0       | 0       | 0     | 0      | 0       | 0       | 0       |         |
| Al <sub>2</sub> O <sub>3</sub> | –          | 0.016   | 0       | 0       | 0     | 0      | 0       | 0       | 0       |         |
| SiO <sub>2</sub>               | –          | 0.040   | 0       | 0       | 0     | 0      | 0       | 0       | 0       |         |
| Fe                             | –          | 0.894   | 0       | 0       | 0     | 0      | 0       | 0       | 0.973   |         |
| C                              | –          | 0.022   | 0       | 0       | 0     | 1.000  | 0       | 0       | 0.027   |         |
| Total                          | –          | 1.000   | 1.000   | 1.000   | 1.000 | 1.000  | 0       | 1.000   | 1.000   |         |

**Table S2:** State-point stream data for the H<sub>2</sub>-DRI-B case

| Stream Number                  | Unit       | 1       | 2      | 3      | 4     | 5     | 6      | 7      | 8       | 9      |
|--------------------------------|------------|---------|--------|--------|-------|-------|--------|--------|---------|--------|
| Temperature                    | °C         | 25      | 775    | 351    | 25    | 41    | 28     | 221    | 25      | 55     |
| Pressure                       | bar        | 2.0     | 2.6    | 1.7    | 4.0   | 1.6   | 1.0    | 1.0    | 35.0    | 2.8    |
| Mole Flowrate                  | kmol/h     | 1,436   | 6,134  | 6,149  | 102   | 402   | 1,956  | 2,225  | 4,407   | 6,134  |
| Mass Flowrate                  | kg/h       | 216,142 | 16,407 | 83,088 | 1,630 | 2,937 | 56,035 | 58,972 | 8,884   | 16,407 |
| Molar Vapor Fraction           | –          | 0       | 1      | 1      | 1     | 1     | 1      | 1      | 1       | 1      |
| Composition                    | mole-basis |         |        |        |       |       |        |        |         |        |
| O <sub>2</sub>                 | –          | 0       | 0      | 0      | 0     | 0     | 0.206  | 0.030  | 0       | 0      |
| N <sub>2</sub>                 | –          | 0       | 0.014  | 0.016  | 0     | 0.037 | 0.775  | 0.688  | 0       | 0.014  |
| H <sub>2</sub> O               | –          | 0       | 0.019  | 0.692  | 0     | 0.049 | 0.019  | 0.236  | 0       | 0.019  |
| H <sub>2</sub>                 | –          | 0       | 0.968  | 0.292  | 0     | 0.661 | 0      | 0      | 1.000   | 0.968  |
| CH <sub>4</sub>                | –          | 0       | 0      | 0      | 1.000 | 0.253 | 0      | 0      | 0       | 0      |
| CO                             | –          | 0       | 0      | 0      | 0     | 0     | 0      | 0      | 0       | 0      |
| CO <sub>2</sub>                | –          | 0       | 0      | 0      | 0     | 0     | 0      | 0.046  | 0       | 0      |
| Fe <sub>2</sub> O <sub>3</sub> | –          | 0.895   | 0      | 0      | 0     | 0     | 0      | 0      | 0       | 0      |
| Al <sub>2</sub> O <sub>3</sub> | –          | 0.030   | 0      | 0      | 0     | 0     | 0      | 0      | 0       | 0      |
| SiO <sub>2</sub>               | –          | 0.075   | 0      | 0      | 0     | 0     | 0      | 0      | 0       | 0      |
| Fe                             | –          | 0       | 0      | 0      | 0     | 0     | 0      | 0      | 0       | 0      |
| C                              | –          | 0       | 0      | 0      | 0     | 0     | 0      | 0      | 0       | 0      |
| Total                          | –          | 1.000   | 1.000  | 1.000  | 1.000 | 1.000 | 1.000  | 1.000  | 1.000   | 1.000  |
| Stream Number                  | Unit       | 10      | 11     | 12     | 13    | 14    | 15     | 16     | 17      |        |
| Temperature                    | °C         | 700     | 148    | 148    | 25    | 25    | 25     | 925    | 1650    |        |
| Pressure                       | bar        | 2.0     | 10.0   | 10.0   | 4.0   | 1.0   | 1.0    | 1.0    | 1.0     |        |
| Mole Flowrate                  | kmol/h     | 2,645   | 273    | 233    | 13    | 375   | –      | 1,545  | 2,485   |        |
| Mass Flowrate                  | kg/h       | 158,127 | 8,666  | 7,393  | 216   | 4,504 | 6,791  | 45,454 | 135,817 |        |
| Molar Vapor Fraction           | –          | 0       | 1      | 1      | 1     | 0     | 0      | 1      | 0       |        |
| Composition                    | mole-basis |         |        |        |       |       |        |        |         |        |
| O <sub>2</sub>                 | –          | 0       | 0.945  | 0.945  | 0     | 0     | 0      | 0.083  | 0       |        |
| N <sub>2</sub>                 | –          | 0       | 0.055  | 0.055  | 0     | 0     | 0      | 0.600  | 0       |        |
| H <sub>2</sub> O               | –          | 0       | 0      | 0      | 0     | 0     | 0      | 0.079  | 0       |        |
| H <sub>2</sub>                 | –          | 0       | 0      | 0      | 0     | 0     | 0      | 0      | 0       |        |
| CH <sub>4</sub>                | –          | 0       | 0      | 0      | 1.000 | 0     | 0      | 0      | 0       |        |
| CO                             | –          | 0       | 0      | 0      | 0     | 0     | 0      | 0.121  | 0       |        |
| CO <sub>2</sub>                | –          | 0       | 0      | 0      | 0     | 0     | 0      | 0.117  | 0       |        |
| Fe <sub>2</sub> O <sub>3</sub> | –          | 0.029   | 0      | 0      | 0     | 0     | 0      | 0      | 0       |        |
| Al <sub>2</sub> O <sub>3</sub> | –          | 0.016   | 0      | 0      | 0     | 0     | 0      | 0      | 0       |        |
| SiO <sub>2</sub>               | –          | 0.041   | 0      | 0      | 0     | 0     | 0      | 0      | 0       |        |
| Fe                             | –          | 0.914   | 0      | 0      | 0     | 0     | 0      | 0      | 0.973   |        |
| C                              | –          | 0       | 0      | 0      | 0     | 1.000 | 0      | 0      | 0.027   |        |
| Total                          | –          | 1.000   | 1.000  | 1.000  | 1.000 | 1.000 | 0      | 1.000  | 1.000   |        |

## S2. EAF off-gas profiles

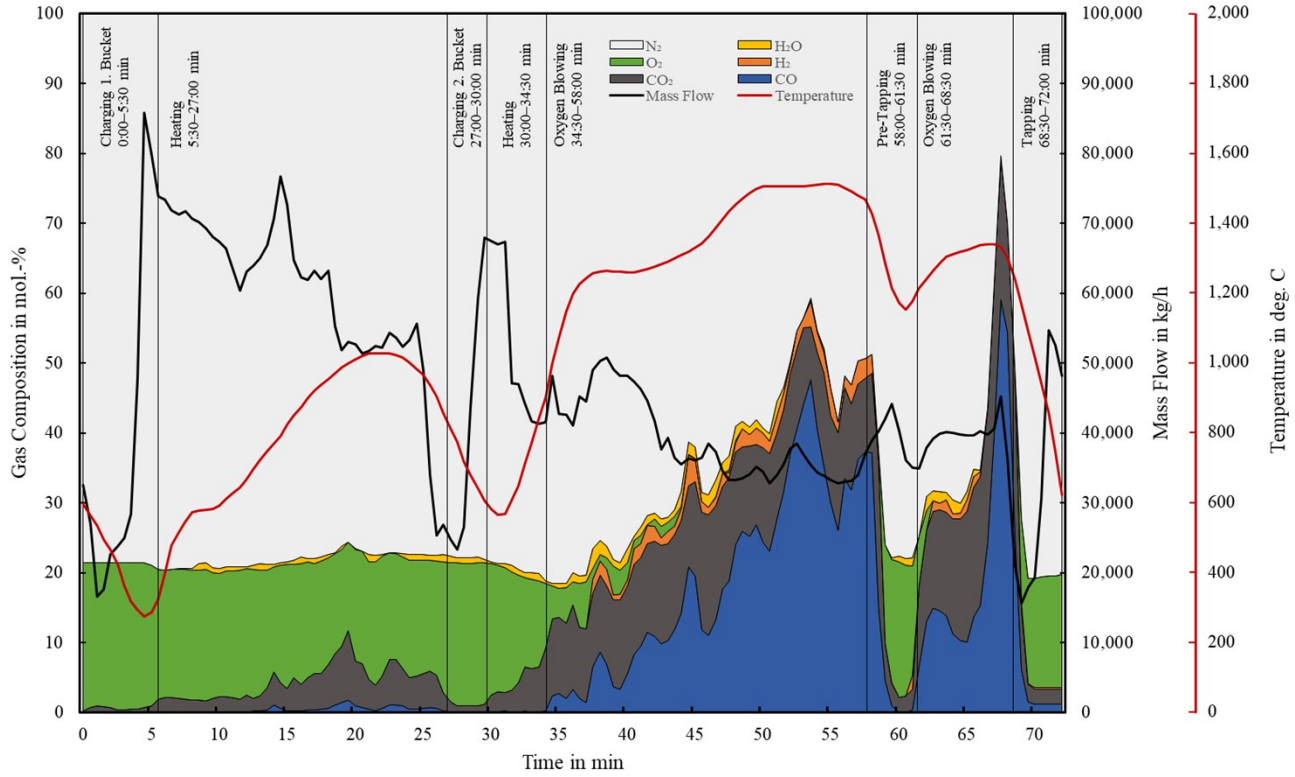

Figure S1: EAF off-gas #1 composition, temperature, and mass flow profiles. Adapted from 1.

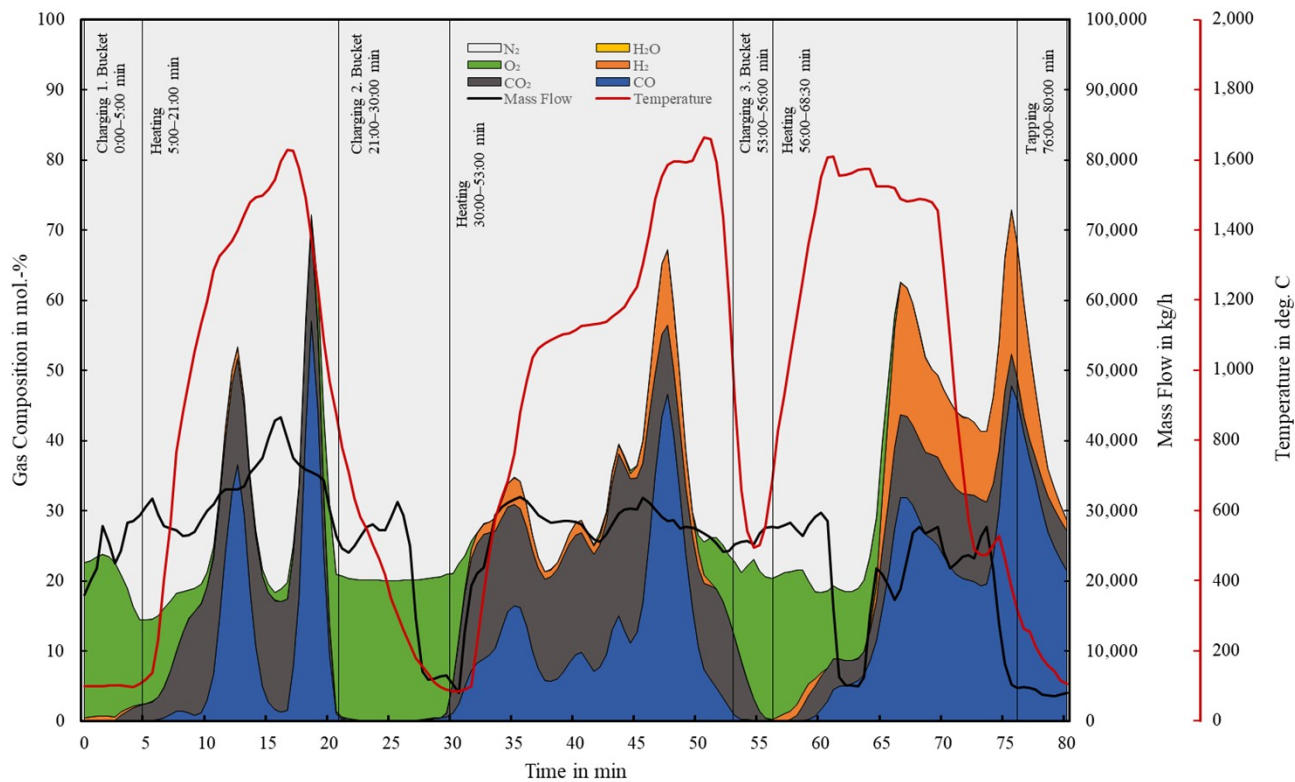

Figure S2: EAF off-gas #2 composition, temperature, and mass flow profiles. Adapted from <sup>2</sup>.



### S3. Performance summary NG-DRI-B case

**Table S3:** Steel Plant Performance for the NG-DRI-B Case

| Plant Design Capacity                      | Value      | Unit                                   |
|--------------------------------------------|------------|----------------------------------------|
| Steel Slab Production Capacity             | 1,162,120  | metric tonnes/year                     |
| Plant Capacity Factor                      | 90         | %                                      |
| Actual Steel Slab Production               | 1,045,908  | metric tonnes/year                     |
| Consumables at 90% CF                      | Value      | Unit                                   |
| Iron Ore Pellets                           | 1,704,001  | metric tonnes/year                     |
| Natural Gas                                | 11,359,188 | GJ/year                                |
| Electricity                                | 606,461    | MWh/year                               |
| Carbon                                     | 29,355     | metric tonnes/year                     |
| Lime                                       | 53,537     | metric tonnes/year                     |
| Raw Water Withdrawal                       | 1,336,953  | metric tonnes/year                     |
| Emissions at 90% CF                        | Value      | Unit                                   |
| Direct Carbon Dioxide Emissions            | 706,351    | metric tonnes/year                     |
| Specific Direct CO <sub>2</sub> Emission   | 0.675      | kg <sub>CO2</sub> /kg <sub>Steel</sub> |
| Specific Indirect CO <sub>2</sub> Emission | 0.643      | kg <sub>CO2</sub> /kg <sub>Steel</sub> |
| Slag                                       | 182,329    | metric tonnes/year                     |
| Surface Water Discharge                    | 372,889    | metric tonnes/year                     |

**Table S4:** Steel Plant Energy Balance for the NG-DRI-B Case at Full Capacity

| Energy Output                        | Value   | Unit |
|--------------------------------------|---------|------|
| Steel Chemical Energy, 0.6%-C (LHV)  | 277,546 | kW   |
| Energy Input                         | Value   | Unit |
| Methane Chemical Energy (LHV)        | 400,219 | kW   |
| Carbon Chemical Energy (LHV)         | 33,886  | kW   |
| Reformer Furnace Air Blower          | 1,284   | kW   |
| Process Gas Recycle                  | 5,367   | kW   |
| Stack Air Blower                     | 3,738   | kW   |
| Scrubber Water Circulation Pump      | 134     | kW   |
| Cooling Tower Fans                   | 175     | kW   |
| Cooling Tower Water Circulation Pump | 757     | kW   |
| Oxygen PSA                           | 5,249   | kW   |
| EAF Reactor                          | 48,162  | kW   |
| EAF Induced Draft Fan                | 165     | kW   |
| Ladle Refining                       | 3,657   | kW   |
| Miscellaneous Balance of Plant       | 8,236   | kW   |
| Energy Efficiency                    | Value   | Unit |
| Steel Reduction Thermal Efficiency   | 54.31   | %    |

**Table S5: Steel Plant Economics for the NG-DRI-B Case**

| Overnight Cost                               | Value   | Unit                  |
|----------------------------------------------|---------|-----------------------|
| Total Plant Cost                             | 795,535 | \$ (thousands)        |
| Preproduction Cost                           | 90,334  | \$ (thousands)        |
| Inventory Capital Cost                       | 46,646  | \$ (thousands)        |
| Initial Catalyst, Sorbent & Chemicals Cost   | 307     | \$ (thousands)        |
| Land                                         | 900     | \$ (thousands)        |
| Other Owners' Costs (18.4% of TPC)           | 119,330 | \$ (thousands)        |
| Financing Costs                              | 21,479  | \$ (thousands)        |
| Fixed Operating Cost                         | Value   | Unit                  |
| Annual Labor Cost                            | 94,713  | \$ (thousands)        |
| Annual Tax and Insurance Cost                | 15,911  | \$ (thousands)        |
| Variable Operating Cost                      | Value   | Unit                  |
| Annual Iron Ore Pellet Feedstock Cost        | 221,520 | \$ (thousands)        |
| Annual Natural Gas Cost                      | 106,803 | \$ (thousands)        |
| Annual Electricity Cost                      | 56,643  | \$ (thousands)        |
| Annual Maintenance Materials Cost            | 10,695  | \$ (thousands)        |
| Annual Chemical, Catalyst & Disposal Costs   | 19,238  | \$ (thousands)        |
| Economic Performance Metrics                 | Value   | Unit                  |
| Specific Steel Plant Cost                    | 669     | \$/metric tonne steel |
| 1 <sup>st</sup> Year Levelized Cost of Steel | 582.18  | \$/metric tonne steel |

**S4. Performance summary H<sub>2</sub>-DRI-B case**

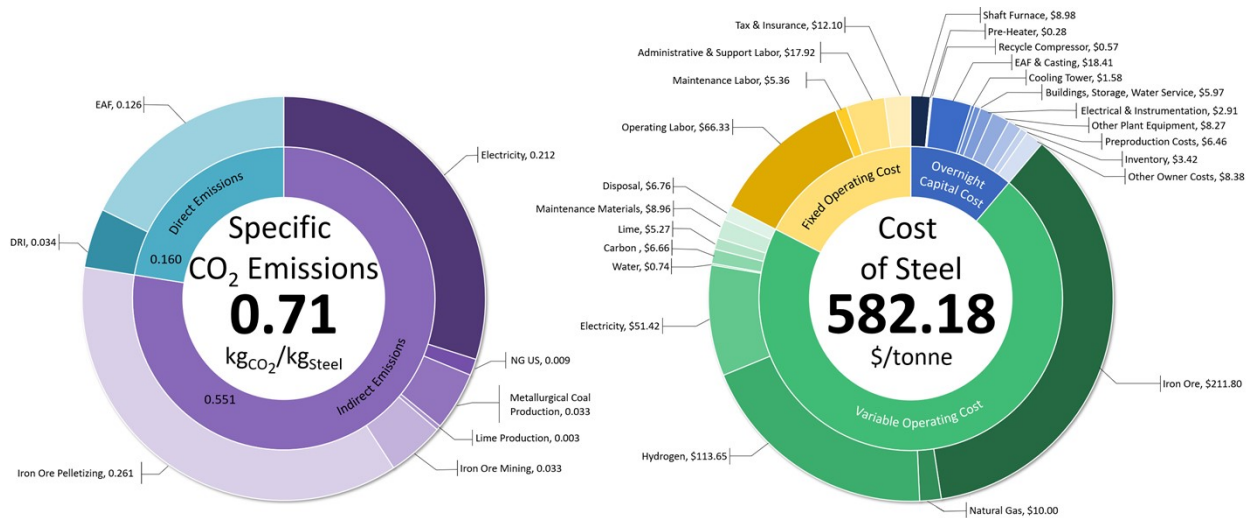

**Figure S3: Breakdown of carbon dioxide emissions (left) and levelized cost of steel (right) for the H<sub>2</sub>-DRI-B case.**



**Table S6:** Steel Plant Performance for the H<sub>2</sub>-DRI-B Case

| Plant Design Capacity                      | Value          | Unit                                   |
|--------------------------------------------|----------------|----------------------------------------|
| Steel Slab Production Capacity             | 1,162,120      | metric tonnes/year                     |
| Plant Capacity Factor                      | 90             | %                                      |
| Actual Steel Slab Production               | 1,045,908      | metric tonnes/year                     |
| Consumables at 90% CF                      | Value          | Unit                                   |
| Iron Ore Pellets                           | 1,704,063      | metric tonnes/year                     |
| Hydrogen Gas                               | 70,042         | metric tonnes/year                     |
| Natural Gas                                | 1,111,997      | GJ/year                                |
| Electricity                                | 575,773        | MWh/year                               |
| Carbon                                     | 35,511         | metric tonnes/year                     |
| Lime                                       | 53,537         | metric tonnes/year                     |
| Raw Water Withdrawal                       | 1,259,784      | metric tonnes/year                     |
| Emissions at 90% CF                        | Value          | Unit                                   |
| Direct Carbon Dioxide Emissions            | 167,487        | metric tonnes/year                     |
| Specific Direct CO <sub>2</sub> Emission   | 0.160          | kg <sub>CO2</sub> /kg <sub>Steel</sub> |
| Specific Indirect CO <sub>2</sub> Emission | 0.551 (0.581)* | kg <sub>CO2</sub> /kg <sub>Steel</sub> |
| Slag                                       | 182,335        | metric tonnes/year                     |
| Surface Water Discharge                    | 458,743        | metric tonnes/year                     |

\*Considering an emission factor of 0.45 kg<sub>CO2</sub>/kg<sub>H2</sub>

**Table S7:** Steel Plant Energy Balance for the H<sub>2</sub>-DRI-B Case at Full Capacity

| Energy Output                        | Value   | Unit |
|--------------------------------------|---------|------|
| Steel Chemical Energy, 0.6%-C (LHV)  | 277,546 | kW   |
| Energy Input                         | Value   | Unit |
| Methane Chemical Energy (LHV)        | 39,179  | kW   |
| Carbon Chemical Energy (LHV)         | 40,992  | kW   |
| Hydrogen Chemical Energy (LHV)       | 296,137 | kW   |
| Process Gas Recycle                  | 1,176   | kW   |
| H <sub>2</sub> Heater Air Blower     | 52      | kW   |
| Scrubber Water Circulation Pump      | 153     | kW   |
| Cooling Tower Fans                   | 215     | kW   |
| Cooling Tower Water Circulation Pump | 931     | kW   |
| Oxygen PSA                           | 10,726  | kW   |
| EHF Reactor                          | 47,820  | kW   |
| EHF Induced Draft Fan                | 65      | kW   |
| Ladle Refining                       | 3,657   | kW   |
| Miscellaneous Balance of Plant       | 8,236   | kW   |
| Energy Efficiency                    | Value   | Unit |
| Steel Reduction Thermal Efficiency   | 61.77   | %    |

**Table S8: Steel Plant Economics for the H<sub>2</sub>-DRI-B Case**

| Overnight Cost                               | Value   | Unit                  |
|----------------------------------------------|---------|-----------------------|
| Total Plant Cost                             | 633,032 | \$ (thousands)        |
| Preproduction Cost                           | 87,019  | \$ (thousands)        |
| Inventory Capital Cost                       | 46,047  | \$ (thousands)        |
| Initial Catalyst, Sorbent & Chemicals Cost   | 0       | \$ (thousands)        |
| Land                                         | 900     | \$ (thousands)        |
| Other Owners' Costs (18.4% of TPC)           | 94,955  | \$ (thousands)        |
| Financing Costs                              | 17,092  | \$ (thousands)        |
| Fixed Operating Cost                         | Value   | Unit                  |
| Annual Labor Cost                            | 93,720  | \$ (thousands)        |
| Annual Tax and Insurance Cost                | 12,661  | \$ (thousands)        |
| Variable Operating Cost                      | Value   | Unit                  |
| Annual Iron Ore Pellet Feedstock Cost        | 221,528 | \$ (thousands)        |
| Annual Natural Gas Cost                      | 10,455  | \$ (thousands)        |
| Annual Hydrogen Cost                         | 118,870 | \$ (thousands)        |
| Annual Electricity Cost                      | 53,777  | \$ (thousands)        |
| Annual Maintenance Materials Cost            | 9,367   | \$ (thousands)        |
| Annual Chemical, Catalyst & Disposal Costs   | 20,315  | \$ (thousands)        |
| Economic Performance Metrics                 | Value   | Unit                  |
| Specific Steel Plant Cost                    | 532     | \$/metric tonne steel |
| 1 <sup>st</sup> Year Levelized Cost of Steel | 582.18  | \$/metric tonne steel |

**S4. Performance summary H<sub>2</sub>-DRI-T case**

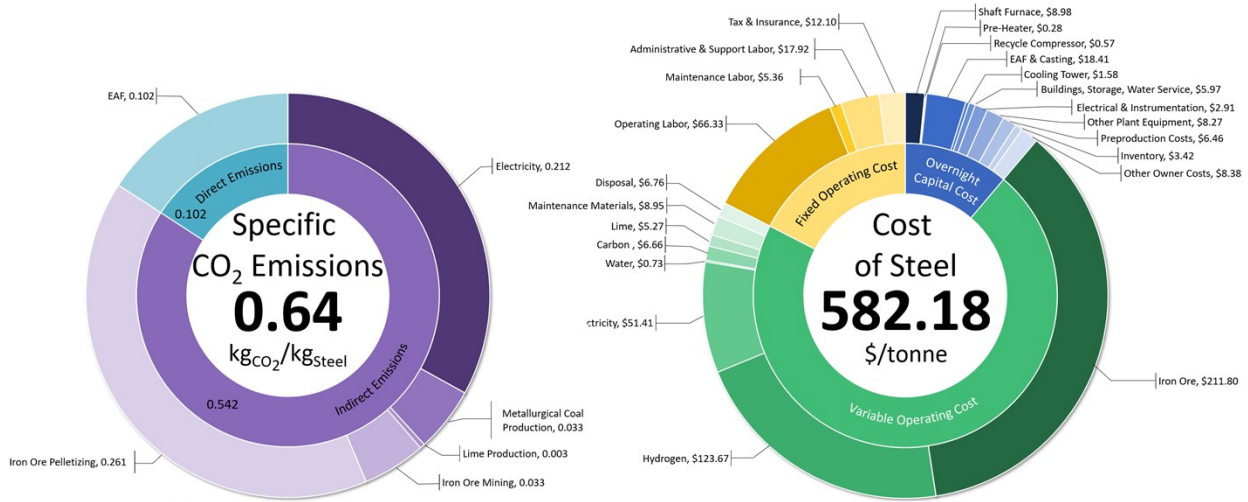

**Figure S4:** Breakdown of carbon dioxide emissions (left) and levelized cost of steel (right) for the H<sub>2</sub>-DRI-T case.

**Table S9:** Steel Plant Performance for the H<sub>2</sub>-DRI-T Case

| Plant Design Capacity                      | Value          | Unit                                   |
|--------------------------------------------|----------------|----------------------------------------|
| Steel Slab Production Capacity             | 1,162,120      | metric tonnes/year                     |
| Plant Capacity Factor                      | 90             | %                                      |
| Actual Steel Slab Production               | 1,045,908      | metric tonnes/year                     |
| Consumables at 90% CF                      | Value          | Unit                                   |
| Iron Ore Pellets                           | 1,704,063      | metric tonnes/year                     |
| Hydrogen Gas                               | 79,466         | metric tonnes/year                     |
| Natural Gas                                | 0              | GJ/year                                |
| Electricity                                | 575,705        | MWh/year                               |
| Carbon                                     | 35,511         | metric tonnes/year                     |
| Lime                                       | 53,537         | metric tonnes/year                     |
| Raw Water Withdrawal                       | 1,255,384      | metric tonnes/year                     |
| Emissions at 90% CF                        | Value          | Unit                                   |
| Direct Carbon Dioxide Emissions            | 106,514        | metric tonnes/year                     |
| Specific Direct CO <sub>2</sub> Emission   | 0.102          | kg <sub>CO2</sub> /kg <sub>Steel</sub> |
| Specific Indirect CO <sub>2</sub> Emission | 0.542 (0.576)* | kg <sub>CO2</sub> /kg <sub>Steel</sub> |
| Slag                                       | 182,335        | metric tonnes/year                     |
| Surface Water Discharge                    | 457,644        | metric tonnes/year                     |

\*Considering an emission factor of 0.45 kg<sub>CO2</sub>/kg<sub>H2</sub>

**Table S10:** Steel Plant Energy Balance for the H<sub>2</sub>-DRI-T Case at Full Capacity

| Energy Output                        | Value   | Unit |
|--------------------------------------|---------|------|
| Steel Chemical Energy, 0.6%-C (LHV)  | 277,546 | kW   |
| Energy Input                         | Value   | Unit |
| Methane Chemical Energy (LHV)        | 0       | kW   |
| Carbon Chemical Energy (LHV)         | 40,992  | kW   |
| Hydrogen Chemical Energy (LHV)       | 335,978 | kW   |
| Process Gas Recycle                  | 1,176   | kW   |
| H <sub>2</sub> Heater Air Blower     | 47      | kW   |
| Scrubber Water Circulation Pump      | 153     | kW   |
| Cooling Tower Fans                   | 214     | kW   |
| Cooling Tower Water Circulation Pump | 929     | kW   |
| Oxygen PSA                           | 10,726  | kW   |
| EAF Reactor                          | 47,820  | kW   |
| EAF Induced Draft Fan                | 65      | kW   |
| Ladle Refining                       | 3,657   | kW   |
| Miscellaneous Balance of Plant       | 8,236   | kW   |
| Energy Efficiency                    | Value   | Unit |
| Steel Reduction Thermal Efficiency   | 61.68   | %    |

**Table S11: Steel Plant Economics for the H<sub>2</sub>-DRI-T Case**

| Overnight Cost                               | Value   | Unit                  |
|----------------------------------------------|---------|-----------------------|
| Total Plant Cost                             | 632,923 | \$ (thousands)        |
| Preproduction Cost                           | 87,017  | \$ (thousands)        |
| Inventory Capital Cost                       | 46,046  | \$ (thousands)        |
| Initial Catalyst, Sorbent & Chemicals Cost   | 0       | \$ (thousands)        |
| Land                                         | 900     | \$ (thousands)        |
| Other Owners' Costs (18.4% of TPC)           | 94,938  | \$ (thousands)        |
| Financing Costs                              | 17,089  | \$ (thousands)        |
| Fixed Operating Cost                         | Value   | Unit                  |
| Annual Labor Cost                            | 93,719  | \$ (thousands)        |
| Annual Tax and Insurance Cost                | 12,658  | \$ (thousands)        |
| Variable Operating Cost                      | Value   | Unit                  |
| Annual Iron Ore Pellet Feedstock Cost        | 221,528 | \$ (thousands)        |
| Annual Natural Gas Cost                      | 0       | \$ (thousands)        |
| Annual Hydrogen Cost                         | 129,349 | \$ (thousands)        |
| Annual Electricity Cost                      | 53,771  | \$ (thousands)        |
| Annual Maintenance Materials Cost            | 9,365   | \$ (thousands)        |
| Annual Chemical, Catalyst & Disposal Costs   | 20,312  | \$ (thousands)        |
| Economic Performance Metrics                 | Value   | Unit                  |
| Specific Steel Plant Cost                    | 532     | \$/metric tonne steel |
| 1 <sup>st</sup> Year Levelized Cost of Steel | 582.18  | \$/metric tonne steel |

### S5. Sensitivity of the break-even cost of hydrogen to changes in natural gas and electricity prices

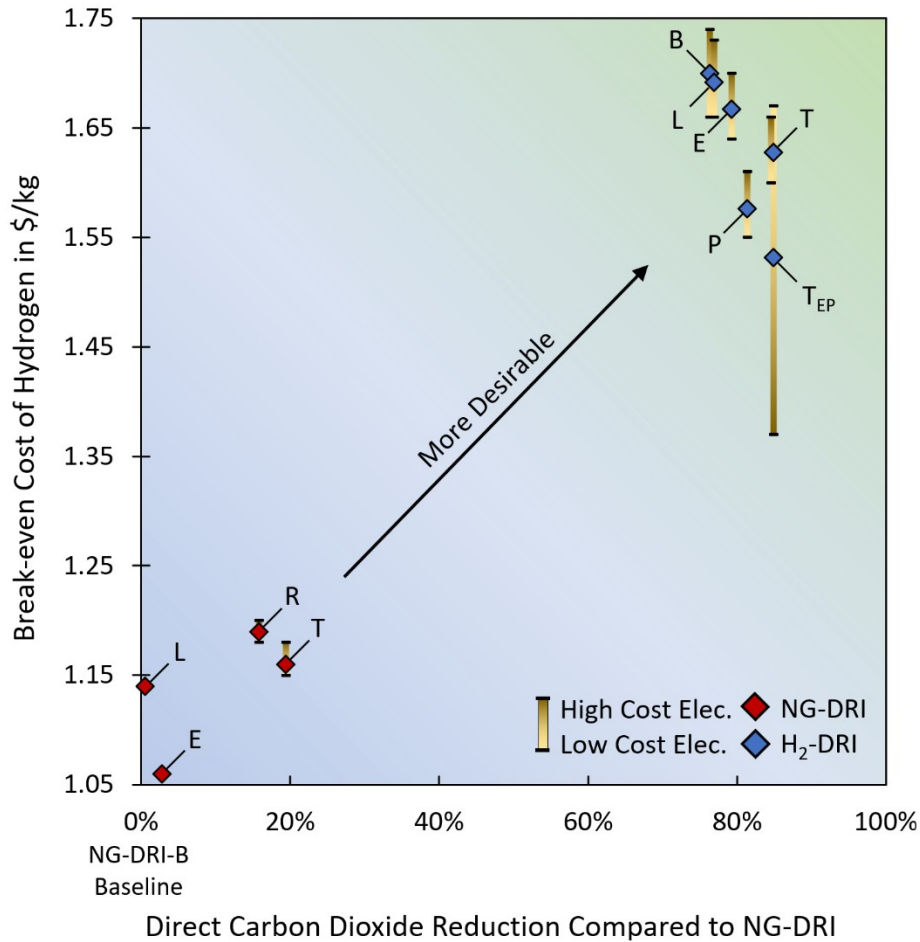

**Figure S5:** Direct carbon dioxide emission reduction potential and associated H<sub>2</sub> break-even prices for the various NG consuming processes in an integrated DRI steel mill. The results of the electricity price sensitivities are indicated by the yellow bars for a range of \$180.00/MWh (dark yellow, representative for Massachusetts, Rhode Island and Alaska) to \$20.00/MWh (light yellow, representative of future renewable electricity prices, lowest electricity prices in the US can be found in Louisiana and Texas at ~\$55.00/MWh).

**Table S12:** Sensitivity Analysis of NG Price and Electricity Price and their Impact upon the Break-even LCOH

| Scenario                   | NG-DRI-B    | NG-DRI-R     | NG-DRI-E     | NG-DRI-L     | NG-DRI-T     | H <sub>2</sub> -DRI-B | H <sub>2</sub> -DRI-P | H <sub>2</sub> -DRI-E | H <sub>2</sub> -DRI-L | H <sub>2</sub> -DRI-T | H <sub>2</sub> -DRI-T <sub>EP</sub> |
|----------------------------|-------------|--------------|--------------|--------------|--------------|-----------------------|-----------------------|-----------------------|-----------------------|-----------------------|-------------------------------------|
| Emission Reduction         | Reference   | 2.8%         | 0.6%         | 15.9%        | 19.4%        | 76.3%                 | 79.3%                 | 76.9%                 | 81.3%                 | 84.9%                 | 84.9%                               |
|                            | LSPC (\$/t) | LCOH (\$/kg)          | LCOH (\$/kg)          | LCOH (\$/kg)          | LCOH (\$/kg)          | LCOH (\$/kg)          | LCOH (\$/kg)                        |
| Base Case                  | 582.18      | 1.06         | 1.14         | 1.19         | 1.16         | 1.70                  | 1.67                  | 1.69                  | 1.58                  | 1.63                  | 1.53                                |
| NG (\$63.69/MWh)           | 665.50      | 1.92         | 2.07         | 2.14         | 2.10         | 2.82                  | 2.78                  | 2.81                  | 2.62                  | 2.72                  | 2.71                                |
| NG (\$8.85/MWh)            | 505.66      | 0.27         | 0.29         | 0.31         | 0.30         | 0.67                  | 0.65                  | 0.66                  | 0.62                  | 0.62                  | 0.46                                |
| Electricity (\$180.00/MWh) | 632.49      | 1.06         | 1.14         | 1.20         | 1.18         | 1.74                  | 1.70                  | 1.73                  | 1.61                  | 1.66                  | 1.37                                |
| Electricity (\$20.00/MWh)  | 539.54      | 1.06         | 1.14         | 1.18         | 1.15         | 1.66                  | 1.64                  | 1.66                  | 1.55                  | 1.60                  | 1.67                                |

## References

1. Kirschen, M., Pfeifer, H., Wahlers, F.-J. & Mees, H. OFF-GAS MEASUREMENTS FOR MASS AND ENERGY BALANCES OF A STAINLESS STEEL EAF. *59th Electr. Furn. Conf. Phoenix USA* (2001).
2. Gandt, K., Meier, T., Echterhof, T. & Pfeifer, H. Heat recovery from EAF off-gas for steam generation: analytical exergy study of a sample EAF batch. *Ironmak. Steelmak.* (2016) doi:10.1080/03019233.2016.1155812.
